## **Absolute quantification of translational regulation and burden using combined sequencing approaches**

Thomas E. Gorochowski<sup>1,2,\*</sup>, Irina Chelysheva<sup>3</sup>, Mette Eriksen<sup>4</sup>, Priyanka Nair<sup>3</sup>, Steen Pedersen<sup>4</sup>, Zoya Ignatova<sup>3,\*</sup>

<sup>1</sup> BrisSynBio, University of Bristol, Life Sciences Building, Tyndall Avenue, Bristol, UK

<sup>2</sup> School of Biological Sciences, University of Bristol, Tyndall Avenue, Bristol, UK

<sup>3</sup> Biochemistry and Molecular Biology, Department of Chemistry, University of Hamburg, Hamburg, Germany

<sup>4</sup> Biomolecular Sciences, Department of Biology, University of Copenhagen, Copenhagen, Denmark

\* Correspondence should be addressed to T.E.G ([thomas.gorochowski@bristol.ac.uk](mailto:thomas.gorochowski@bristol.ac.uk)) and Z.I. ([zoya.ignatova@uni-hamburg.de](mailto:zoya.ignatova@uni-hamburg.de))

**Keywords:** translation; transcription; Ribo-seq; RNA-seq; genetic circuits; biometrology; systems biology; synthetic biology

1 **Abstract**

2 Translation of mRNAs into proteins is a key cellular process. Ribosome binding sites and stop  
3 codons provide signals to initiate and terminate translation, while stable secondary mRNA structures  
4 can induce translational recoding events. Fluorescent proteins are commonly used to characterize  
5 such elements but require the modification of a part's natural context and allow only a few  
6 parameters to be monitored concurrently. Here, we develop an approach that combines ribosome  
7 profiling (Ribo-seq) with quantitative RNA sequencing (RNA-seq) to enable the high-throughput  
8 characterization of genetic parts controlling translation in absolute units. We simultaneously  
9 measure 743 translation initiation rates and 746 termination efficiencies across the *Escherichia coli*  
10 transcriptome, in addition to translational frameshifting induced at a stable RNA pseudoknot  
11 structure. By analyzing the transcriptional and translational response, we discover that sequestered  
12 ribosomes at the pseudoknot contribute to a  $\sigma^{32}$ -mediated stress response, codon-specific pausing,  
13 and a drop in translation initiation rates across the cell. Our work demonstrates the power of  
14 integrating global approaches towards a comprehensive and quantitative understanding of gene  
15 regulation and burden in living cells.

## 16 Introduction

17 Gene expression is a multi-step process involving the transcription of DNA into messenger RNA  
18 (mRNA) and the translation of mRNAs into proteins. To fully understand how a cell functions and  
19 adapts to changing environments and adverse conditions (e.g., disease or chronic stress),  
20 quantitative methods to precisely observe these processes are required (Belliveau *et al*, 2018).  
21 Gene regulatory networks (also known as genetic circuits) control where and when these processes  
22 take place and underpin many important cellular phenotypes. Recently, there has been growing  
23 interest in building synthetic genetic circuits to understand the function of natural gene regulatory  
24 networks through precise perturbations and/or creating systems *de novo* (Wang *et al*, 2016;  
25 Smanski *et al*, 2016).

26 In synthetic biology, genetic circuits are designed to control gene expression in a desired  
27 way (Brophy & Voigt, 2014). Circuits have been built to implement a range of digital (Fernandez-  
28 Rodriguez *et al*, 2015; Moon *et al*, 2012) and analog functions (Daniel *et al*, 2013), and have been  
29 integrated with endogenous pathways to control cellular behaviors (Tan *et al*, 2016; Nielsen & Voigt,  
30 2014). The construction of a genetic circuit requires the assembly of many DNA-encoded parts that  
31 control the initiation and termination of transcription and translation. A major challenge is predicting  
32 how a part will behave when assembled with many others (Cardinale *et al*, 2013). The sequences of  
33 surrounding parts (Poole *et al*, 2000), interactions with other circuit components or the host cell  
34 (Ceroni *et al*, 2015; Gyorgy *et al*, 2015; Cardinale *et al*, 2013; Gorochowski *et al*, 2016), and the  
35 general physiological state of the cell (Gorochowski *et al*, 2014; Wohlgemuth *et al*, 2013) can all  
36 alter a part's behavior. Although biophysical models have been refined to capture some contextual  
37 effects (Salis *et al*, 2009; Espah Borujeni *et al*, 2013; Seo *et al*, 2013), and new types of part created  
38 to insulate against these factors (Shendure *et al*, 2017; Yang *et al*, 2014; Daniel *et al*, 2013; Moon *et al*  
39 *et al*, 2012; Siuti *et al*, 2013; Mutalik *et al*, 2013), we have yet to reach a point where large and robust  
40 genetic circuits can be reliably built on our first attempt.

41 Fluorescent proteins and probes are commonly used to characterize the function of genetic  
42 parts (Hecht *et al*, 2017; Jones *et al*, 2014) and debug the failure of genetic circuits (Nielsen *et al*,  
43 2016). When used for characterization, the part of interest is usually placed into a new genetic  
44 backbone (often a plasmid) and its behavior is directly linked to the expression of one or more  
45 fluorescent proteins (Cambray *et al*, 2013). When debugging a circuit failure, it is not possible to  
46 extract the part of interest as the context of the circuit is important. For circuits that use transcription  
47 rate (i.e. RNAP flux) as a common signal between components (Canton *et al*, 2008), debugging  
48 plasmids containing a promoter responsive to the signal of interest have been used to track the  
49 propagation of signals and reveal the root cause of failures (Nielsen *et al*, 2016). Alternatively, any

50 genes whose expression is controlled by the part of interest can be tagged by a fluorescent protein  
51 (Snapp, 2005). Such modifications allow for a readout of protein level but come at the cost of  
52 alterations to the circuit. This is problematic as there is no guarantee the fluorescent tag itself will not  
53 affect a part's function (Baens *et al*, 2006; Margolin, 2012).

54 The past decade has seen tremendous advances in sequencing technologies. This has  
55 resulted in continuously falling costs and a growing range of information that can be captured  
56 (Goodwin *et al*, 2016). Sequencing methods exist to measure chromosomal architecture  
57 (Lieberman-aiden *et al*, 2009), RNA secondary structure (Lucks *et al*, 2011), DNA and RNA  
58 abundance (Conesa *et al*, 2016), and translation efficiency (Ingolia, 2014). New developments have  
59 expanded the capabilities even further towards more quantitative measurements of transcription and  
60 protein synthesis rates with native elongating transcript sequencing (NET-seq) (Mayer *et al*, 2015)  
61 and ribosome profiling (Ribo-seq) (Li *et al*, 2014; Ingolia *et al*, 2009). Ribo-seq provides position-  
62 specific information on the translating ribosomes through sequencing of ribosome-protected  
63 fragments (RPFs; approximately 25–28 nt) which allows genome-wide protein synthesis rates to be  
64 inferred with accuracy similar to quantitative proteomics (Li *et al*, 2014).

65 Sequencing technologies offer several advantages over fluorescent probes for  
66 characterization and debugging genetic parts and circuits. First, they do not require any modification  
67 of the circuit DNA. Second, they provide a more direct measurement of the processes being  
68 controlled (e.g. monitoring transcription of specific RNAs), and third, they capture information  
69 regarding the host response and consequently their indirect effects on a part's function.  
70 Furthermore, for large multi-component circuits or synthetic genomes, sequencing is the only way of  
71 gaining a comprehensive view of the system's behavior, offering a scalable approach which goes  
72 beyond the limited numbers of fluorescent probes that can be measured simultaneously. Recently,  
73 RNA-seq has been used to characterize every transcriptional component in a large logic circuit  
74 composed of 46 genetic parts (Gorochowski *et al*, 2017). While successful in demonstrating the  
75 ability to characterize genetic part function, observe internal transcriptional states, and find the root  
76 cause of circuit failures, the use of RNA-seq alone restricts the method to purely transcriptional  
77 elements and does not allow for quantification of this process in physically meaningful units.

78 Here, we address these limitations by combining Ribo-seq with a modified version of RNA-  
79 seq to quantitatively characterize genetic parts controlling transcription and translation at a  
80 nucleotide resolution. By supplementing the sequencing data with other experimentally measured  
81 cell parameters, we are able to generate transcription and translation profiles that capture the flux of  
82 RNA polymerases (RNAPs) and ribosomes governing these processes in absolute units. We apply  
83 our method to *Escherichia coli* and demonstrate how local changes in these profiles can be

84 interpreted using biophysical models to measure the performance of five different types of genetic  
85 part in absolute units. Finally, we demonstrate how genome-wide shifts in transcription and  
86 translation can be used to dissect the burden that synthetic genetic constructs place on the host cell  
87 and the role that competition for shared cellular resources, such as ribosomes, plays.

88

## 89 **Results**

### 90 *Generating transcription and translation profiles in absolute units*

91 To enable quantification of both transcription and translation in absolute units, we modified the RNA-  
92 seq protocol and extended the Ribo-seq protocol with quantitative measurements of cellular  
93 properties (red elements in **Figure 1A**). For RNA-seq, we introduced a set of RNA spike-ins to our  
94 samples at known molar concentrations before the random alkaline fragmentation of the RNA (left  
95 panel, **Figure 1A**). The RNA spike-ins span a wide range of lengths (250–2000 nt) and  
96 concentrations and share no homology with the transcriptome of the host cell (**Supplementary**  
97 **Figure S1**). Using the known concentrations of the RNA spike-ins, the mapped reads can be  
98 converted to absolute molecule counts and then normalized by cell counts give absolute transcript  
99 copy numbers per cell (Bartholomäus *et al*, 2016; Mortazavi *et al*, 2008) (**Materials and Methods**).  
100 The total number of transcripts per cell was ~8200 which well correlates with earlier measurements  
101 of ~7800 mRNA copies/per cell using a single spike-in (Bartholomäus *et al*, 2016). Similar overall  
102 copy numbers have been theoretically predicted (Bremer *et al*, 2003) and experimentally determined  
103 for another *E. coli* strain (Taniguchi *et al*, 2010). For Ribo-seq, we directly ligated adaptors to the  
104 extracted ribosome-protected fragments (RPFs) (Guo *et al*, 2010) to capture low-abundance  
105 transcripts (Del Campo *et al*, 2015). Sequencing was also complemented with additional  
106 measurements of cell growth rate, count, and protein mass (right panel, **Figure 1A**).

107 A previous method was employed to generate the transcription profiles that capture the  
108 number of RNAPs passing each nucleotide per unit time across the entire genome (i.e. the RNAP  
109 flux). This assumes that RNA levels within the cells have reached a steady-state (Gorochofski *et al*,  
110 2017) and that all RNAs have a fixed degradation rate ( $0.0067 \text{ s}^{-1}$ ) (Chen *et al*, 2015) so that RNA-  
111 seq data, which captures a snapshot of relative abundances of RNAs, can be used to estimate  
112 relative RNA synthesis rates (Gorochofski *et al*, 2017). Because each RNA is synthesized by an  
113 RNAP these values are equivalent to the relative RNAP flux. By using the known molar  
114 concentrations of the RNA spike-ins and their corresponding RNA-seq reads from our modified  
115 protocol (**Supplementary Figure S1**), we are able to convert the transcription profiles into RNAP/s  
116 units. Existing biophysical models of promoters and terminators were then used to interpret changes

117 in the transcription profiles and infer the performance of these parts in absolute units, similar to  
118 previous work (Gorochowski *et al*, 2017).

119 To generate the translation profiles that capture the ribosome flux per transcript, we first took  
120 each uniquely mapped RPF read from the Ribo-seq data and considering the architecture of a  
121 translating ribosome we estimated the central nucleotide of each codon in the ribosomal P site (e.g.  
122 the peptidyl-tRNA site) (**Materials and Methods**) (Mohammad *et al*, 2016). By summing these  
123 positions for all reads at each nucleotide  $x$ , we computed the RPF coverage  $N(x)$ . If we assume that  
124 each ribosome translates at a relatively constant speed, which holds true in most cases  
125 (Gorochowski *et al*, 2015; Li *et al*, 2014), then the RPF coverage is proportional to the number of  
126 ribosomes at each nucleotide at a point in time and thus captures relative differences in ribosome  
127 flux; more heavily translated regions will have a larger number of ribosomes present and so accrue  
128 a larger number of RPF reads in the Ribo-seq snapshot.

129 We next needed to convert the RPF coverage into a translation profile whose height  
130 corresponds directly to the ribosome flux in ribosomes/s units. By assuming that each RPF read  
131 corresponds to an actively translating ribosome which synthesizes a full-length protein product and  
132 that the cellular proteome is at steady-state, then the protein copy number for gene  $i$  is given by  $n_i =$   
133  $\frac{f_i m_t}{f_t m_i}$ . Here,  $f_t$  is the total number of mapped RPF reads,  $m_t$  is the total protein mass per cell, and  $f_i$   
134 and  $m_i$  are the number of mapped RPF reads and the protein mass of gene  $i$ , respectively. We  
135 measured  $m_t$  directly (**Figure 1A**) and calculated  $m_i$  from the amino acid sequence of gene  $i$   
136 (**Materials and Methods**). Because proteins are synthesized by incorporating individual amino  
137 acids during the translocation cycle (i.e. by ribosome translocating from the A to P site), the  
138 replication of the entire proteome requires  $r_t = \sum_i n_i a_i$  ribosome translocations, where  $a_i$  is the  
139 number of amino acids in the protein encoded by gene  $i$ . Assuming that cells are growing at a  
140 constant rate with doubling time  $t_d$ , then the total ribosome flux across the entire transcriptome per  
141 unit time is given by  $q = 3r_t/t_d$ . The factor of three accounts for ribosomes translocating at three-  
142 nucleotide registers (i.e. 1 codon/s = 3 nt/s). Finally, the translation profile for nucleotide  $x$  is  
143 calculated by multiplying the total ribosome flux  $q$  by the fraction of active ribosomes  $N(x)/f_t$  at that  
144 position and normalizing by the number of transcripts per cell of the gene being translated  $m_x$ ,  
145 computed from the RNA-seq data (**Figure 1A**). This gives,

$$146 \quad R(x) = \frac{q \cdot N(x)}{m_x f_t}. \quad (1)$$

147 Importantly, because both the transcription and translation profiles are given in absolute units  
148 (RNAP/s and ribosomes/s, respectively), they can be directly compared across samples without any  
149 further normalization.

150

151 *Characterizing genetic parts controlling translation*

152 Genetic parts controlling translation alter ribosome flux along a transcript and these changes are  
 153 captured by the translation profiles. We developed biophysical models to interpret these signals and  
 154 quantify the performance of RBSs, stop codons and translational recoding (e.g. ribosome  
 155 frameshifting) in open reading frames (ORFs) at stable secondary structures.

156 In prokaryotes, RBSs facilitate translation initiation and cause a jump in the translation profile  
 157 after the start codon of the associated gene due to an increase in ribosome flux originating at that  
 158 location (**Figure 1B**). If initiation is rate limiting (Li *et al*, 2014), then the translation initiation rate of  
 159 an RBS (in ribosomes/s units) is given by the increase in ribosome flux downstream of the RBS,

$$160 \delta R = \sum_{i=x_s}^{x_e} \frac{R(i)-C(i)}{(x_e-x_s)} - \sum_{i=x_0-n}^{x_0} \frac{R(i)-C^- - C^+}{n}. \quad (2)$$

161 Here,  $x_0$  is the start point of the RBS, and  $x_s$  and  $x_e$  are the start and end point of the protein coding  
 162 region associated with the RBS, respectively (**Figure 1B**). A window of  $n = 30$  nt (10 codons) was  
 163 used to average fluctuations in the translation profile upstream of the RBS; the averaging window is  
 164 equal to the approximate length of a ribosome footprint. If the transcription start site (TSS) of the  
 165 promoter expressing this transcript fell in the upstream window, then the start point ( $x_0 - n$ ) was  
 166 adjusted to the TSS to ensure that the incoming ribosome flux is not underestimated. A similar  
 167 change was made if the coding sequence was within an operon and the end of an upstream gene  
 168 falls in this window. In this case, the start point was adjusted to 9 nt (3 codons) downstream of the  
 169 stop codon of the overlapping gene. We also included correction factors to remove the effect of  
 170 translating ribosomes upstream of the RBS that are not in the same reading frame as the RBS-  
 171 controlled ORF, and therefore may not fully traverse the coding sequence due to out-of-frame stop  
 172 codons. These are given by,

$$173 c^- = \sum_{i=0}^{(x_0-n)/3} \frac{R(x_0-n+3i+2)}{(x_0-n)/3}, \quad (3)$$

$$174 c^+ = \sum_{i=0}^{(x_0-n)/3} \frac{R(x_0-n+3i+1)}{(x_0-n)/3}, \quad (4)$$

$$175 C(x) = \begin{cases} c^- + c^+, & x < s^- \wedge x < s^+ \\ c^-, & x < s^- \wedge x \geq s^+ \\ c^+, & x \geq s^- \wedge x < s^+ \\ 0, & \text{otherwise} \end{cases} \quad (5)$$

176 where  $s^-$  and  $s^+$  are the positions of the first out-of-frame stop codon downstream of  $x_0 - n$  in the  $-1$   
 177 and  $+1$  reading frame, respectively.  $c^-$  and  $c^+$  capture the average out-of-frame ribosome flux in the  
 178 region upstream of the RBS in the  $-1$  and  $+1$  reading frame, respectively, and  $C(x)$  calculates the  
 179 total sum of these ribosome fluxes that would reach nucleotide  $x$  downstream of the RBS.

180 In eukaryotes, genes are generally monocistronic and translation initiation occurs through  
181 scanning of the 5' untranslated region (5'-UTR) by the 43S preinitiation complex until a start codon is  
182 reached. This allows a translation-competent 80S ribosome to assemble and translation elongation  
183 to begin (Jackson *et al*, 2010). In this case, no ribosome flux is generated by upstream genes.  
184 Therefore, when calculating the initiation rate of a 5'-UTR, the second term in Equation 2 and the  
185 correction factors are set to zero (i.e.  $\delta R = \sum_{i=x_s}^{x_e} \frac{R(i)}{(x_e-x_s)}$ ).

186 Ribosomes terminate translation and disassociate from a transcript when a stop codon (TAA,  
187 TAG or TGA) is encountered. This leads to a drop in the translation profile at these points (**Figure**  
188 **1C**). Although this process is typically efficient, there is a rare chance that some ribosomes may  
189 read through a stop codon and continue translating downstream (Arribere *et al*, 2016). Assuming  
190 that all ribosomes translating the protein coding region are in-frame with the associated stop codon  
191 and do not frameshift prior to it, then the termination efficiency of the stop codon (i.e. the fraction of  
192 ribosomes terminating) is given by,

$$193 T_e = 1 - \frac{\sum_{i=x_1}^{x_1+n} R(i)/n}{\sum_{i=x_s}^{x_0} R(i)/(x_0-x_s)}, \quad (6)$$

194 where  $x_0$  and  $x_1$  are the start and end nucleotide of the stop codon, respectively,  $x_s$  is the start of the  
195 coding region associated to this stop codon, and  $n = 30$  nt (10 codons) is the window, with the same  
196 width as described above, used to average fluctuations in the translation profile downstream of the  
197 stop codon (**Figure 1C**). If additional stop codons are present in the downstream window, the end  
198 point of this window ( $x_1 + n$ ) was adjusted to ensure that the termination efficiency of only the (first)  
199 stop codon was measured. A similar adjustment was made if the end of a transcript generated by an  
200 upstream promoter ends within this window.

201 Translation converts the information encoded in mRNA into protein whereby each triplet of  
202 nucleotides (a codon) is translated into a proteinogenic amino acid. Because of the three-nucleotide  
203 periodicity in the decoding, each nucleotide could be either in the first, second or third position of a  
204 codon, thus defining three reading frames for every transcript. Consequently, a single mRNA  
205 sequence can encode three different proteins. Although synthetic biology rarely use multiple reading  
206 frames, natural systems exploit this feature in many different ways (Giedroc & Cornish, 2009;  
207 Condron *et al*, 1991a; Tsuchihashi & Kornberg, 1990; Bordeau & Felden, 2014). In our workflow, the  
208 RPFs used to generate the translation profiles were aligned to the middle nucleotide of the codon  
209 residing in the ribosomal P site, providing the frame of translation. To characterize genetic parts that  
210 cause translational recoding through ribosomal frameshifting, we compared regions directly before  
211 and after the part. Strong frameshifting will cause the fraction of RPFs to shift from the original frame  
212 to a new one when comparing these regions with the frameshifting efficiency given by,



$$F_e = 1 - \frac{\sum_{i=x_1}^{x_e} R(i)/(x_e-x_1)}{\sum_{i=x_s}^{x_0} R(i)/(x_0-x_s)} . \quad (7)$$

Here,  $x_0$  is the nucleotide at the start of the region where frameshifting occurs, and  $x_1$  is the end nucleotide of the stop codon for the first coding sequence (**Figure 1D**).

### Measuring genome-wide translation initiation and termination in *Escherichia coli*

We applied our approach to *Escherichia coli* cells harboring a *lacZ* gene whose expression is induced using isopropyl  $\beta$ -D-1-thiogalactopyranoside (IPTG) (**Figure 2A**). After induction for 10 min, *lacZ* expression reached 14% of the total cellular protein mass (**Supplementary Table S1**). Samples from non-induced and induced cells were subjected to the combined sequencing workflow (**Figure 1A**). Sequencing yielded between 41–199 million reads per sample (**Supplementary Table S2**) with no measurable bias across RNA lengths and concentrations (**Supplementary Figure S1**), and a high correlation in endogenous gene expression between biological replicates ( $R^2 > 0.96$ ; **Supplementary Figure S2**).

Transcription and translation profiles were generated from this data and used to measure translation initiation rates of RBSs and termination efficiencies of stop codons across the genome. To remove the bias due to the RPF enrichment in the 5'-end of coding regions (Ingolia *et al*, 2009) (**Figure 2B**),  $x_s$  was adjusted to 51 bp (17 codons) downstream of the start codon when estimating average ribosome flux across a coding region in Equations 2 and 6. To determine whether translation rates were constant across each gene, we compared the number of RPFs mapping to the first and second half of each coding region. This is a necessary condition for our models to ensure that changes in the height of a translation profile between two different points is purely a result of initiating or terminating ribosomes. If the speed of a translating ribosome varies along a transcript, then regions of slower movement would be enriched in RPFs, resulting in an increase in the translation profile at those points. This would make it impossible from the translation profile alone to distinguish between changes in ribosome speed and the rate of initiation/termination events. If the ribosomes traverse the coding sequence at a constant speed, then the two halves of a transcript should have a near identical RPF coverage. We found a high correlation between both halves for non-induced and induced cells suggesting a constant speed of the ribosomes across the coding sequences (**Supplementary Figure S3**).

We characterized chromosomal RBSs in *E. coli* by assuming that each covered a region spanning 15 bp upstream of the start codon. The translation initiation rates of the 761 RBSs we measured varied over two orders of magnitude with a median initiation rate of 0.1 ribosome/s (**Figure 2C**; **Supplementary Data S1**). This closely matches previously measured rates for single

246 genes (Kennell & Riezman, 1977). A few RBSs mostly related to stress response functions (*tabA*,  
247 *hdeA*, *uspA*, *uspG*), the ribosomal subunit protein L31 (*rpmE*), and some unknown genes (*ydiH*,  
248 *yjdM*, *yjfN*, *ybeD*), reached much higher rates of up to 2.45 ribosomes/s.

249 To estimate termination efficiency at chromosomal stop codons, we considered that they  
250 spanned 9 nt up and downstream of the stop codon (**Figure 2B**). We also excluded overlapping  
251 genes and those bearing internal sites that promote frameshifting, both of which break the  
252 assumptions of our model (Baggett *et al*, 2017). In total, the termination efficiency of 746 stop  
253 codons was measured and their median termination efficiency across the genome was found to be  
254 0.987, with 336 of them (45% of all measured) having termination efficiencies >0.99 (**Figure 2D**;  
255 **Supplementary Data S2**). Similar performance for both RBSs ( $R^2 = 0.84$ ) and terminators ( $R^2 =$   
256  $0.52$ ) was found between non-induced and induced conditions (**Figures 2E and 2F**; **Supplementary**  
257 **Data S1 and S2**).

258

### 259 *Quantifying differences in transcription and translation of endogenous and synthetic genes*

260 The quantitative measurements produced by our methodology allow both transcription and  
261 translation to be monitored simultaneously. To demonstrate this capability, we first focused on  
262 differences in the contributions of transcription and translation to overall protein synthesis rates of  
263 endogenous genes in *E. coli*. For each gene we calculated the protein synthesis rate by multiplying  
264 the transcript copy number by the RBS-mediated translation initiation rate per transcript. We found a  
265 strong correlation with previously measured synthesis rates (Li *et al*, 2014) (**Figure 3A**). We also  
266 extracted the transcription and translation profiles of three genes (*uspA*, *ompA* and *gapA*) whose  
267 protein synthesis rate was similar, but whose expression was controlled differently at the levels of  
268 transcription and translation (**Figures 3B**). Quantification of the promoters and RBSs for these three  
269 genes showed more than an order of magnitude difference in their transcription and translation  
270 initiation rates; *uspA* was weakly transcribed and highly translated, *ompA* was highly transcribed and  
271 weakly translated, and *gapA* was moderately transcribed and translated (**Figure 3C**).

272 Because we measure transcription and translation initiation rates in absolute units, it was  
273 also possible to determine their relative contribution to the final synthesis rate by calculating the ratio  
274 of transcription and translation initiation rates, giving RNAPs/ribosomes. High RNAP/ribosome  
275 values relate to genes whose expression is mostly controlled by transcription, while low values  
276 correspond to a greater contribution by translation. This analysis revealed a non-uniform split with a  
277 trend for weakly expressed genes to be mostly governed by translation, while strongly expressed  
278 genes were mostly controlled by transcription (**Figure 3A**).

279           These different modes of gene expression have a major influence on the efficiency of protein  
280 synthesis (Ceroni *et al*, 2015) and can influence the variability in protein levels between cells (Raser  
281 & O’Shea, 2005). For example, the most metabolically efficient way to strongly express a protein of  
282 interest is by producing very high numbers of transcripts (high transcription initiation rate and stable  
283 transcript) with a relatively weak RBS (low translation initiation rate). This ensures that each  
284 ribosome initiating on a transcript has a very low probability of colliding with others, guaranteeing  
285 efficient translation elongation. Indeed, we observe this efficient expression strategy is enriched for  
286 strongly expressed endogenous genes (**Figure 3A**).

287           We next sought to demonstrate the ability to measure dynamic changes in the function of  
288 regulatory parts using the LacZ construct. We quantified the inducible promoter and terminator  
289 controlling transcription, and the RBS and stop codon controlling translation when the inducer IPTG  
290 was absent and present. The transcription and translation profiles clearly showed the beginning and  
291 end of both the transcript and protein coding region, with sharp increases and decreases at  
292 transcriptional/translational start and stop sites (**Figure 3D**). Induction caused a large increase in the  
293 number of *lacZ* transcripts from 0.18 to 110 copies per cell, which was directly observed in the  
294 transcription profiles. In contrast, the translation profiles remained stable across conditions. The  $P_{tac}$   
295 promoter initiated transcription at a rate of 0.0009 RNAP/s in the absence and 0.73 RNAP/s in the  
296 presence of IPTG (1 mM) (**Figure 3E**). The RBS for the *lacZ* gene had consistent translation  
297 initiation rates of between 0.21 and 0.35 ribosomes/s, respectively (**Figure 3E**). It may seem  
298 counterintuitive to observe translation without IPTG induction because very few transcripts will be  
299 present. However, leaky expression from the  $P_{tac}$  promoter was sufficient to capture enough RPFs  
300 during sequencing to generate a translation profile. It should be noted that the translation profile  
301 represents the ribosome flux per transcript, thus its shape was nearly identical to that when the  $P_{tac}$   
302 promoter was induced. Like the RBS, both the transcriptional terminator and stop codon showed  
303 similar efficiencies of 0.93–0.95 and 0.9–0.93, respectively (**Figure 3E**).

304

### 305 *Characterizing a synthetic pseudoknot that induces translational recoding*

306 Pseudoknots (PKs) are stable tertiary structures that regulate gene expression. They are frequently  
307 combined with slippery sequences in compact viral genomes to stimulate translational recoding and  
308 produce multiple protein products from a single gene (Giedroc & Cornish, 2009; Brierley *et al*, 2007;  
309 Sharma *et al*, 2014; Tsuchihashi & Kornberg, 1990). The percentage of recoding events generally  
310 reflects the stoichiometry of the translated proteins (e.g. capsule proteins for virus assembly), and  
311 helps overcome problems where the stochastic nature of transcription and translation make  
312 maintenance of specific ratios difficult (Condrón *et al*, 1991a). PKs are the most common type of

313 structure used to facilitate mostly  $-1$  frameshifting (Atkins *et al*, 2016) and in much rarer cases  $+1$   
314 frameshifting (e.g., in eukaryotic antizyme genes) (Ivanov *et al*, 2004). PKs consist of a hairpin with  
315 an additional loop that folds back to stabilize the hairpin via extra base pairing (**Figure 4A**). In  
316 addition to stimulating recoding events, PKs regulate translational initiation, where they interfere with  
317 an RBS through antisense sequences that base pair with the RBS (Unoson & Wagner, 2007;  
318 Bordeau & Felden, 2014). They also act as an evolutionary tool, reducing the length of sequence  
319 needed to encode multiple protein coding regions and therefore act as a form of genome  
320 compression.

321 Two elements signal and stimulate frameshifting. The first is a slippery site consisting of a  
322 heptanucleotide sequence of the form XXXYYYYZ which enables out-of-zero-frame pairing in the A or  
323 P site of the ribosome, facilitating recoding events. The second is a PK situated 6–8 nt downstream  
324 of the slippery site. In bacteria, the distance between the slippery site and the 5'-end of the PK  
325 positions mRNA in the entry channel of the 30S ribosomal subunit, enabling contact with the PK  
326 which pauses translation and provides an extended time window for frameshifting to occur (Giedroc  
327 & Cornish, 2009).

328 To demonstrate our ability to characterize this process, we created an inducible genetic  
329 construct (referred to as PK-LacZ) that incorporated a virus-inspired PK structure within its natural  
330 context (*gene10*) fused to *lacZ* in a  $-1$  frame (**Figure 4A**) (Tholstrup *et al*, 2012). A slippery site  
331 UUUAAAG preceded the PK. *Gene10* of bacteriophage T7 produces two proteins, one through  
332 translation in the zero frame and one through a  $-1$  frameshift; both protein products constitute the  
333 bacteriophage capsid (Condrón *et al*, 1991b). We generated translation profiles to assess ribosome  
334 flux along the entire construct (**Figure 4B**). These showed high-levels of translation up to the PK  
335 with a major drop of 80–90% at the PK to the end of the *gene10* coding region, and a further drop of  
336 ~97% after this region (**Figure 4B**). To analyze frameshifting within *gene10*, we divided the  
337 construct into three regions: (1) the *gene10* gene up to the slippery site, (2) the middle region, which  
338 covers the slippery site along with the PK up to the *gene10* stop codon, and (3) the downstream  
339 *lacZ* gene in a  $-1$  frame. For each region, we calculated the fraction of RPFs in each frame as a  
340 total of all three possible frames. We found that the zero and  $-1$  frames dominate the *gene10* and  
341 *lacZ* regions, respectively, with >46% of all RPFs being found in these frames (top row, **Figure 4C**).  
342 The middle region saw a greater mix of all three, and the zero-frame further dropped in the *lacZ*  
343 region. This is likely due to a combination of ribosomes that have passed the PK successfully and  
344 terminated in zero-frame at the end of *gene10* and those that have frameshifted. Similar results  
345 were found with and without induction by IPTG (**Figure 4C**). An identical analysis of the reading  
346 frames from the RNA-seq data revealed that no specific frame was preferred with equal fractions of

347 each (bottom row, **Figure 4C**). This suggests that the reading frames recovered for the RPFs were  
348 not influenced by any sequencing bias. We further tested if the major translation frame could be  
349 recovered by analyzing the entire genome and measured the fraction of each frame across every  
350 gene. The correct zero-frame dominated in most cases (**Figure 4D**).

351 Finally, to calculate the efficiency of frameshifting by the PK, we compared the density of  
352 RPFs per nucleotide for the middle and *lacZ* regions. Because the PK causes ribosome stalling, the  
353 assumption of constant ribosome speed is broken for the *gene10* region upstream of the PK.  
354 Therefore, when calculating the frameshifting efficiency using Equation 7,  $x_s$  and  $x_0$  were set to the  
355 start and end nucleotide of the middle region, directly downstream of the PK where pausing was not  
356 expected to occur. We found that the PK caused 2–3% of ribosomes to frameshift, ~3-fold less than  
357 the 10% reported for the PK in its natural context (Condrón *et al*, 1991a).

358

### 359 *Cellular response to a strong synthetic pseudoknot*

360 Expression of strong PKs can severely impact cell growth, but the reason for this remains unclear  
361 (Tholstrup *et al*, 2012). We observed a large number of RPF reads within the *gene10* region (**Figure**  
362 **4B**) and many of these reads capture stalled ribosomes. Stalling increases the abundance of  
363 partially synthesized protein products but also limits the availability of translational resources, raising  
364 the question as to whether expression of the PK-LacZ construct elicits cellular stress by  
365 sequestering ribosomes. To better understand the burden that expression of both *lacZ* and *PK-lacZ*  
366 exhibited on the cell, we compared shifts in transcription (i.e. mRNA counts) and translation  
367 efficiency (i.e. density of ribosome footprints per mRNA) of endogenous genes following induction  
368 with IPTG (**Figure 5A**; **Supplementary Data S3**). No major changes were observed for the LacZ  
369 construct (**Figure 5A**). In contrast, the PK-LacZ construct caused significant shifts in the expression  
370 of 491 genes (**Supplementary Data S4**). Of these, 341 were transcriptionally (i.e. significant  
371 changes in mRNA counts) and 204 translationally regulated (i.e. significant changes in translational  
372 efficiency), with little overlap (54 genes) between the two types of regulation (**Figure 5B**). Of the  
373 transcriptionally regulated genes, most saw a drop in mRNA counts, while translationally regulated  
374 genes were split between increasing and decreasing translational efficiencies. Gene ontology (GO)  
375 analysis revealed a clustering of transcriptionally downregulated genes in categories mostly linked to  
376 translation, e.g. ribosomal proteins, amino acid biosynthesis, amino acid activation (aminoacyl  
377 synthetases), and genes involved in respiration and catabolism (**Supplementary Data S5**).  
378 Transcriptionally upregulated genes were associated with ATP binding, chaperones (*ftsH*, *lon*, *clpB*,  
379 *dnaJK*, *groLS*, *htpG*), ion binding, proteolytic activities (*ftsH*, *prlC*, *htpX*), and an endoribonuclease  
380 (*ybeY*). Interestingly, the expression of all of these are under  $\sigma^{32}$  regulation which is the most

381 common regulatory mode to counteract heat stress.  $\sigma^{32}$  upregulation is often observed by  
382 expressing synthetic constructs, although the precise mechanism of  $\sigma^{32}$  activation is not known  
383 (Ceroni *et al*, 2018). In our case, the incompletely synthesized polypeptides from the stalled  
384 ribosomes on the *PK-LacZ* mRNA are most likely partially folded or misfolded and generate  
385 misfolding stress similar to the heat shock response. Binding of the major *E. coli* chaperone  
386 systems, DnaK/DnaJ and GroEL/S, to the misfolded proteins negatively regulates  $\sigma^{32}$ . The shift of  
387 the chaperones to misfolded proteins releases  $\sigma^{32}$ , which then binds to the RNA polymerases and  
388 induces expression of heat shock genes (Mogk *et al*, 2011; Guisbert *et al*, 2004). This notion is  
389 supported by the fact that *dnaJ*, *groL/S*, and *grpE* were transcriptionally upregulated during PK  
390 induction as well as *ftsh*, which encodes the protease that degrades  $\sigma^{32}$ .

391 To test whether *PK-lacZ* expression caused changes in translation dynamics (e.g. ribosome  
392 pausing at particular codons), we next computed the dwell time of ribosomes at each codon (also  
393 known as codon occupancy) across the genome and compared it to that without inducing *PK-lacZ*  
394 expression (Lareau *et al*, 2014). Notable increases in occupancy were found for the codons AGA,  
395 CTA, CCC, TCC, which encode for arginine, leucine, proline and serine, respectively (**Figure 5C**).  
396 All of these codons are rarely used in the genome for their cognate amino acid but were found in  
397 higher proportions across *gene10*. For example, the CTA codon that codes for leucine is only used  
398 by 4% of codons in the genome, while accounting for 8% of the *gene10* region. Coupled with the  
399 strong expression of *gene10*, the stress induced by this abnormal demand on cellular resources  
400 would be amplified.

401 The broad shifts in regulation at a cellular-scale and changes in codon occupancy suggest  
402 that *PK-lacZ* expression may significantly limit the availability of shared cellular resources. From a  
403 translational perspective, this would manifest as a cell-wide drop in translation initiation rates as the  
404 pool of free ribosomes would be reduced (Gorochoowski *et al*, 2016). To test this hypothesis, we  
405 compared the RBS initiation rates of endogenous genes before and after induction of *lacZ* and *PK-*  
406 *lacZ* expression and found a consistent reduction across all genes for both synthetic constructs  
407 (**Figure 5D; Supplementary Data S1**). While relatively small for the LacZ construct (18%) where no  
408 notable stress response was detected, the PK-LacZ construct triggered a large (43%) drop in  
409 translation initiation rates across the cell (**Figure 5D**). Analysis of the transcriptome composition and  
410 distribution of engaged ribosomes across cellular transcripts further revealed that the PK-LacZ  
411 construct made up 40% of all mRNAs and captured 47% of the shared ribosome pool engaged in  
412 translation (**Figure 5E**). This would account for the global drop in translation initiation rates and  
413 misfolding stress induced by the partially translated proteins from *gene10* transcripts, explaining the  
414 strong  $\sigma^{32}$ -mediated response.

415 We also observed a large difference in the number of transcripts for each construct after  
416 induction; the *lacZ* transcripts were 43-fold lower than those for *PK-lacZ* (81 vs. 3504 transcripts/cell,  
417 respectively). Such a difference is unlikely to occur solely through an increased transcription  
418 initiation rate at the  $P_{tac}$  promoter. Previous studies have shown that the decay rate of the *lacZ*  
419 transcript is highly dependent on the interplay between transcription and translation rates (Yarchuk  
420 *et al*, 1992; Makarova *et al*, 1995; Iost & Dreyfus, 1995). RNase E sites within the coding region  
421 become accessible to cleavage by RNase E when translation initiation rates are low because fewer  
422 translating ribosomes are present to sterically shield these sites and prevent degradation (Yarchuk  
423 *et al*, 1992). This mechanism could account for the lower *lacZ* transcript numbers, which in turn  
424 would reduce the number of sequestered ribosomes translating *lacZ* mRNAs and explain the lack of  
425 a stress response for this construct.

426

## 427 Discussion

428 In this work, we present new approach to quantify transcription and translation in living cells at a  
429 nucleotide resolution. This is based on a deep-sequencing workflow that combines a modified  
430 version of RNA-seq and Ribo-seq with measures of key cellular parameters and uses biophysical  
431 models to interpret this data (**Figure 1**). We show that our high-throughput approach is able to  
432 simultaneously characterize the translation initiation rate of 743 RBSs and termination efficiency of  
433 746 stop codons across the *E. coli* transcriptome (**Figure 2**), in addition to measuring the precise  
434 behavior of the genetic parts controlling transcription and translation of several endogenous genes  
435 and a synthetic genetic construct that expresses *lacZ* (**Figure 3**). Because our methodology is  
436 based on sequencing, it can scale beyond the number of simultaneous measurements that are  
437 possible with common fluorescence-based approaches, and through the use of spike-in standards  
438 we are able to extract part parameters in absolute units (i.e. transcription and translation rates in  
439 RNAP/s and ribosomes/s units, respectively).

440 To demonstrate the ability to quantitatively assess various translational processes that have  
441 been difficult to measure, we studied the behavior of a genetic construct that contains a strong virus-  
442 inspired PK structure that induces a translational frameshift (**Figure 4**). Following expression of *PK-*  
443 *lacZ*, the main reading frame shifts, but the efficiency is ~3-fold lower than the PKs native viral  
444 context. In contrast to *lacZ* expression, *PK-lacZ* also causes a major burden to the cell, sequestering  
445 a large proportion of the shared gene expression machinery, e.g. ribosomes (**Figure 5**). We observe  
446 transcriptome-wide increases in ribosome dwell times at codons rare for the *E. coli* endogenous  
447 genes, but more frequent in the synthetic construct, suggesting that the strong expression of this  
448 gene places significant demands on the translational resources of the cell. This burden also results

449 in significant changes in gene regulation (both transcriptional and translational), which was mediated  
450 by the alternative polymerase subunit,  $\sigma^{32}$  that remodels the bacterial proteome following thermal  
451 stress (Guo & Gross, 2014a). The likely cause of  $\sigma^{32}$  activation is a combination of strong  
452 overexpression of *gene10* and misfolding stress triggered by partial unfolding of incompletely  
453 synthesized polypeptides (Giedroc & Cornish, 2009; Guo & Gross, 2014b). To our knowledge the  
454 stress response induced by a strong pseudoknot has not been reported before making this work a  
455 valuable data set for future studies.

456 Previous studies have used sequencing to investigate translational regulation. Ribo-seq was  
457 employed by Li *et al.* (Li *et al.*, 2014) to measure the protein synthesis rate of 3,041 genes and by  
458 Baggett *et al.* (Baggett *et al.*, 2017) to analyze translation termination at 1200 stop codons. However,  
459 unlike our approach, which is calibrated by external RNA spike-in standards, these previous studies  
460 had no means of assessing the sensitivity of their measurements. Measuring the variability of  
461 several different RNA spike-in molecules at similar known molar concentrations allows us to  
462 accurately calculate a detection limit, emphasizing the benefit of including external standards in  
463 sequencing experiments.

464 A limitation of our approach is that the models underpinning the generation and interpretation  
465 of the transcription and translation profiles rely on some key assumptions that may not always hold  
466 true. For the transcription profiles to accurately capture RNAP flux it is essential that the system has  
467 reached a steady-state because RNA-seq only measures RNA abundance at a single point in time  
468 and not directly the rate of RNA production (Gorochowski *et al.*, 2017). While this assumption is valid  
469 for cells that have been exponentially dividing for several generations, rapidly changing RNA  
470 production or degradation rates (e.g. through increased expression of degradation machinery or a  
471 change in growth phase) may cause issues. Furthermore, for quantification of absolute transcript  
472 numbers, while the RNA spike-ins will undergo the same depletion during sequencing library  
473 preparation, it is necessary to assume that the total RNA from the cells is efficiently extracted prior  
474 to this step. Incomplete cell lysis or low-efficiency RNA extraction would require a further correction  
475 during the quantification process.

476 For the translation profiles, the key assumptions are that every ribosome footprint gives rise  
477 to a full-length protein and that translation elongation globally proceeds at a near uniform speed  
478 along all transcripts. Translation is a complex multi-step process and can be affected by ribosome  
479 pausing (e.g. due to amino acid charge) (Charneski & Hurst, 2013), premature termination  
480 (Freistroffer *et al.*, 2000), and environmental conditions that alter cell physiology (Bartholomäus *et al.*,  
481 2016) or the global availability of cellular resources (e.g. ribosomes, tRNAs, amino acids) (Dong *et al.*  
482 *et al.*, 1996; Wohlgemuth *et al.*, 2013; Gorochowski *et al.*, 2016). Although these factors normally have



483 only a small effect (Ingolia *et al*, 2009; Li *et al*, 2014), significant genome-wide shifts induced by  
484 long-term chronic stress can increase their occurrence and potentially alter translation elongation  
485 speed and processivity in a non-uniform way (Bartholomäus *et al*, 2016). Our calculation of absolute  
486 protein synthesis rates also relies on the assumption that proteins are stable with dilution by cell  
487 division dominating their degradation rate (Li *et al*, 2014). This holds for most proteins, but care  
488 should be taken under stress conditions or for synthetic constructs where the proteome is heavily  
489 modified (e.g. by overexpressing proteases).

490         Being able to measure RNAP and ribosome flux across multi-component genetic circuits  
491 offers synthetic biologists a powerful tool for designing and testing new living systems (Nielsen *et al*,  
492 2016; Gorochowski *et al*, 2017). These capabilities are particularly useful for large genetic circuits  
493 where many parts must function together to generate a required phenotype. Ideally, complex circuits  
494 are built by readily connecting simpler parts together. In electronics this is made possible by using  
495 the flow of electrons as a common signal that captures the state at every point in a circuit. This  
496 signal can be easily routed between components using conductive wires to create more complex  
497 functionalities. In genetic circuits, RNAP and ribosome fluxes can serve a similar role acting as  
498 common carrier signals (Canton *et al*, 2008; Brophy & Voigt, 2014). Promoters and RBSs guide  
499 these signals to particular points in a circuit's DNA/RNA and allow them to propagate and be  
500 transformed.

501         The ability to easily connect large numbers of genetic parts allows for the implementation of  
502 more complex functionalities, but can also lead to fragile circuits that break easily (Nielsen *et al*,  
503 2016). This is particularly common for those that use components with sharp switch-like transitions  
504 (e.g. repressors with high cooperativity) (Nielsen *et al*, 2016). These types of part can lead to  
505 situations where although the output of the circuit behaves as desired, it becomes highly sensitive to  
506 changes in growth conditions or the inclusion of other genetic components (Gorochowski *et al*,  
507 2017). This problem arises because the state of these parts can fall close to their sharp transition  
508 point allowing for minor perturbations to cause large deviations in expression that then propagate to  
509 the output of the circuit. The only way to ensure the robustness of such systems is to measure every  
510 internal state (Gorochowski *et al*, 2017) or to implement feedback control within the circuit itself to  
511 enable self-regulation (Ceroni *et al*, 2018). The ability to monitor every element in a circuit also  
512 makes our approach valuable when elucidating the root cause of failures. Instead of time-consuming  
513 tinkering with a circuit until the problem is found, our method allows for targeted modifications that  
514 precisely correct malfunctioning parts, accelerating developments in the field (Gorochowski *et al*,  
515 2017).

516 Mature engineering fields rely on predictive models to efficiently develop complex systems  
517 by reducing the need to physically construct and test each design. To date, the accuracy of models  
518 in synthetic biology have been hampered by a lack of reliable, quantitative and high-throughput  
519 measurements of genetic parts and devices, as well as their effects on the host cell. Attempts have  
520 been made to improve this situation by using standard calibrants to increase reproducibility across  
521 labs and equipment (Castillo-Hair *et al*, 2016; Davidsohn *et al*, 2015; Beal *et al*, 2016) and by  
522 including synthetic RNA spike-ins to enable absolute quantification of transcription (Owens *et al*,  
523 2016). Our methodology complements these efforts by combining RNA-seq and Ribo-seq with RNA  
524 spike-in standards to quantify the regulation of transcription and translation by genetic circuits. The  
525 importance of pushing biology towards measurements in absolute units has also seen growing  
526 interest (Justman, 2018) and is becoming widely recognized as essential for developing mechanistic  
527 models that can support reliable predicative design (Jones *et al*, 2014; Belliveau *et al*, 2018; Endy *et al*  
528 *et al*, 2000). To demonstrate why, it is important to realize that many behaviors are intrinsically linked  
529 to their absolute scale. For example, the stochastic nature of biochemical reactions means that the  
530 inherent noise when only a few molecules are present will be far greater than when there are many.  
531 Therefore, knowing if one arbitrary unit corresponds to one or 10,000 molecules is essential if the  
532 models are to hold any predictive power as to the expected variability. The use of absolute  
533 measurements in mechanistic models of biological parts (Belliveau *et al*, 2018; Jones *et al*, 2014)  
534 and entire genetic systems (Endy *et al*, 2000) has already seen some success.

535 As we attempt to implement ever more complex functionalities in living cells (Nielsen *et al*,  
536 2016) and push towards a deeper understanding of the processes sustaining life, scalable and  
537 comprehensive methodologies for quantitative measurement of fundamental processes become  
538 paramount. Such capabilities will move us beyond a surface-level view of living cells to one that  
539 allows the exploration of their inner most regulation and homeostasis.

540

## 541 **Materials and Methods**

542 *Strains, media, and inducers.* The *E. coli* K12 strain, [K-12, *recA1*  $\Delta$ (*pro-lac*) *thi ara F':lacIq1*  
543 *lacZ::Tn5 proAB+*], harbours a pBR322-derived plasmid containing either *lacZ* with a fragment insert  
544 that contains a truncated *lac* operon with the  $P_{tac}$  promoter and the wildtype *lacZ* under *lacI* control,  
545 or a pseudoknot-*lacZ* (*PK-lacZ*) consisting of *gene10*, a virus-derived RNA pseudoknot (Tholstrup *et al*  
546 *et al*, 2012), 22/6a, fused upstream of the *lacZ*. Bacteria were grown in MOPS minimal medium  
547 supplemented with 0.4% glycerol, 2.5  $\mu$ g/ml vitamin B1, 100  $\mu$ g/ml ampicillin, 20  $\mu$ g/ml kanamycin  
548 and additionally 50  $\mu$ g/ml arginine for the *lacZ* expressing strain. The cells were grown for at least 10  
549 generations at 37°C to ensure stable exponential growth before induction.

550

551 *Gene expression and preparation of the sequencing libraries.* *LacZ* and *PK-lacZ* expression were  
552 induced with isopropyl  $\beta$ -D-1-thiogalactopyranoside (IPTG) to a final concentration of 1 mM at OD<sub>600</sub>  
553  $\approx$  0.4 for 10 min and 15 min, respectively. One aliquot of each culture was used to isolate RPFs and  
554 prepare the cDNA library for Ribo-seq as described in Bartholomäus *et al.* (Bartholomäus *et al.*,  
555 2016) In parallel, from another aliquot, total RNA was isolated with TRIzol (Invitrogen) and subjected  
556 to random alkaline fragmentation for RNA-seq as described in Bartholomäus *et al.* (Bartholomäus *et al.*  
557 *et al.*, 2016) Different than the previous protocol, prior to alkaline fragmentation, the total RNA was  
558 spiked in with RNA standards (ERCC RNA Spike-In Mix; Ambion) which were used to (a) determine  
559 the detection limit in each data set and (b) calculate the copy numbers per cell. The RNA standards  
560 consist of 92 different transcripts, covering lengths of 250-2000 nt and approximately a 106-fold  
561 concentration range. Detection threshold (RPKM) has been set at values with a linear dependence  
562 between the reads from the spike-in controls and concentration in each RNA-Seq data set. Spike-ins  
563 with linear correlation were used in the copy number analysis (**Supplementary Figure S1**). Total  
564 protein concentration (grams of wet mass per ml culture) were determined by the Bradford assay  
565 using serial dilutions of the exponentially growing cells at different time points (e.g. prior the  
566 induction time at OD 0.4 and following induction with 1 mM IPTG). Using the cell number and the  
567 volume of *E. coli* as 1 femtoliter, the protein mass was recalculated as grams of wet protein mass  
568 per cell.

569

570 *Processing of sequencing data.* Sequenced reads were quality trimmed using fastx-toolkit version  
571 0.0.13.2 (quality threshold: 20), sequencing adapters were cut using cutadapt version 1.8.3 (minimal  
572 overlap: 1 nt) and the reads were uniquely mapped to the genome of *E. coli* K-12 MG1655 strain  
573 using Bowtie version 1.1.2 allowing for a maximum of two mismatches. *LacZ* and other similar parts  
574 of the plasmids were masked in the genome. Reads aligning to more than one sequence including  
575 tRNA and rRNA were excluded from the data. The raw reads were used to generate gene read  
576 counts by counting the number of reads whose middle nucleotide (for reads with an even length the  
577 nucleotide 5' of the mid-position) fell in the coding sequence (CDS). Gene read counts were  
578 normalized by the length of the unique CDS per kilobase (RPKM units) and the total mapped reads  
579 per million (RPM units) (Mortazavi *et al.*, 2008). Biological replicates were performed for all  
580 sequencing reactions. Based on the high correlation between replicates (**Supplementary Figure**  
581 **S2**), reads from both biological replicates were merged into metagene sets (Ingolia *et al.*, 2009).  
582 Differential gene expression was performed using DESeq2 version 1.20. Firstly, transcripts with  $P <$   
583 0.01 for both translational efficiency and mRNA expression were selected.  $P$ -values were adjusted

584 for multiple testing using false-discovery rate (FDR) according to Benjamini and Hochberg. Since the  
585 RNA-Seq data sets have very high reproducibility between replicates (**Supplementary Figure S1**),  
586 we decided to apply more restrictive threshold  $P < 0.001$  and additionally selected the 25th  
587 percentile. The GO terms with significant enrichment ( $P < 0.01$ ) were calculated using GO.db  
588 version 2.10.

589

590 *Calculating absolute transcript numbers.* To calculate the transcript copy number, we used a method  
591 previously described by Bartholomäus *et al.* and Mortazavi *et al.* (Bartholomäus *et al.*, 2016;  
592 Mortazavi *et al.*, 2008). Briefly, the mapped reads for a transcript were related to the total reads and  
593 the length of the transcriptome. The latter was determined using the molecules of all spike-in  
594 standards above the detection limit (**Supplementary Figure S1**) and was normalized by cell  
595 number.

596

597 *Calibration of ribosome profiling reads.* RPFs were binned in groups of equal read length, and each  
598 group was aligned to the stop codons as described previously by Mohammad *et al.* (Mohammad *et al.*  
599 *et al.*, 2016) For each read length we calculated the distance between the point a transcript leaves the  
600 ribosome and the middle nucleotide in the P site. This distance was used to determine the center of  
601 each P site codon along each mRNA. As expected, the majority of our sequence reads were 23–28  
602 nt and these read lengths were used for the further analysis. The ribosome dwelling occupancy per  
603 codon over the whole transcriptome was calculated as described by Lareau *et al.* (Lareau *et al.*,  
604 2014), where the reads over each position within a gene were normalized to the average number of  
605 footprints across this gene. Metagene analysis of the ribosome occupancies within the start and stop  
606 codon regions was performed as described by Baggett *et al.* (Baggett *et al.*, 2017) Thereby, only  
607 genes with at least 5 RPFs in the chosen window were considered. Overlapping genes were  
608 excluded from the analysis.

609

610 *Data analysis and visualization.* Data analysis was performed using custom scripts run with R  
611 version 3.4.4 and Python version 3.6.3. Plots was generated using matplotlib version 2.1.2 and  
612 genetic constructs were visualized using DNAPlotlib version 1.0 (Der *et al.*, 2017) with Synthetic  
613 Biology Open Language Visual (SBOLv) notation (Myers *et al.*, 2017).

614

615 *Data availability.* Sequencing data from RNA-Seq and Ribo-Seq were deposited in the Sequence  
616 Read Archive (<https://www.ncbi.nlm.nih.gov/sra/>) under accession number SRP144594.

617

618 **Acknowledgements**

619 We thank Alexander Bartholomäus for the initial mapping and earlier data analysis. This work was  
620 supported by BrisSynBio, a BBSRC/EPSRC Synthetic Biology Research Centre (grant  
621 BB/L01386X/1), a Royal Society University Research Fellowship (grant UF160357 to T.E.G.), the  
622 MOLPHYSX program of the University of Copenhagen (S.P.), and by the European Union (grants  
623 NICHE ITN and SynCrop ETN to Z.I.)

624

625 **Author Contributions**

626 Z.I. and T.E.G. conceived of the study. M.E. performed the sequencing experiments, P.N. performed  
627 the quantitative determination of cellular parameter. S.P. provided the LacZ and PK-LacZ constructs  
628 and advised the experimental acquisition of sequencing data. T.E.G. developed the biophysical  
629 models. I.C. processed the sequencing data. Z.I., T.E.G. and I.C. analyzed the data. Z.I., T.E.G. and  
630 I.C. wrote the manuscript.

631

632 **Conflict of Interest**

633 The authors declare no competing financial interest.

634 **References**

- 635 Arribere JA, Cenik ES, Jain N, Hess GT, Lee CH, Bassik MC & Fire AZ (2016) Translation  
636 readthrough mitigation. *Nature* **534**: 719–723
- 637 Atkins JF, Loughran G, Bhatt PR, Firth AE & Baranov P V. (2016) Ribosomal frameshifting and  
638 transcriptional slippage: From genetic steganography and cryptography to adventitious use.  
639 *Nucleic Acids Res.* **44**: 7007–7078
- 640 Baens M, Noels H, Broeckx V, Hagens S, Fevery S, Billiau AD, Vankelecom H & Marynen P (2006)  
641 The dark side of EGFP: Defective polyubiquitination. *PLoS One* **1**: 1–6
- 642 Baggett NE, Zhang Y & Gross C (2017) Global analysis of translation termination in *E. coli*. *PLoS*  
643 *Genet.* **13**: e1006676
- 644 Bartholomäus A, Fedyunin I, Feist P, Sin C, Zhang G, Valleriani A & Ignatova Z (2016) Bacteria  
645 differently regulate mRNA abundance to specifically respond to various stresses. *Philos. Trans.*  
646 *R. Soc. A Math. Phys. Eng. Sci.* **374**: 20150069
- 647 Beal J, Haddock-Angelli T, Gershater M, De Mora K, Lizarazo M, Hollenhorst J, Rettberg R, Demling  
648 P, Hanke R, Osthege M, Schechtel A, Sudarsan S, Zimmermann A, Gabryelczyk B, Ikonen M,  
649 Salmela M, Acar M, Aktas MF, Bestepe F, Ceylan FS, et al (2016) Reproducibility of  
650 fluorescent expression from engineered biological constructs in *E. coli*. *PLoS One* **11**: 1–22
- 651 Belliveau NM, Barnes SL, Ireland WT, Jones DL, Sweredoski MJ, Moradian A, Hess S, Kinney JB &  
652 Phillips R (2018) Systematic approach for dissecting the molecular mechanisms of  
653 transcriptional regulation in bacteria. *Proc. Natl. Acad. Sci.* **115**: E4796–E4805
- 654 Bordeau V & Felden B (2014) Curli synthesis and biofilm formation in enteric bacteria are controlled  
655 by a dynamic small RNA module made up of a pseudoknot assisted by an RNA chaperone.  
656 *Nucleic Acids Res.* **42**: 4682–4696
- 657 Bremer H, Dennis P & Ehrenberg M (2003) Free RNA polymerase and modeling global transcription  
658 in *Escherichia coli*. *Biochimie* **85**: 597–609
- 659 Brierley I, Pennell S & Gilbert RJC (2007) Viral RNA pseudoknots: Versatile motifs in gene  
660 expression and replication. *Nat. Rev. Microbiol.* **5**: 598–610
- 661 Brophy JAN & Voigt CA (2014) Principles of genetic circuit design. *Nat Meth* **11**: 508–520
- 662 Cambray G, Guimaraes JC, Mutalik VK, Lam C, Mai QA, Thimmaiah T, Carothers JM, Arkin AP &  
663 Endy D (2013) Measurement and modeling of intrinsic transcription terminators. *Nucleic Acids*  
664 *Res.* **41**: 5139–5148
- 665 Del Campo C, Bartholomäus A, Fedyunin I & Ignatova Z (2015) Secondary Structure across the  
666 Bacterial Transcriptome Reveals Versatile Roles in mRNA Regulation and Function. *PLoS*  
667 *Genet.* **11**: 1–23

- 668 Canton B, Labno A & Endy D (2008) Refinement and standardization of synthetic biological parts  
669 and devices. *Nat. Biotechnol.* **26**: 787–93
- 670 Cardinale S, Joachimiak MP & Arkin AP (2013) Effects of genetic variation on the E. coli host-circuit  
671 interface. *Cell Rep.* **4**: 231–237
- 672 Castillo-Hair SM, Sexton JT, Landry BP, Olson EJ, Igoshin OA & Tabor JJ (2016) FlowCal: A User-  
673 Friendly, Open Source Software Tool for Automatically Converting Flow Cytometry Data from  
674 Arbitrary to Calibrated Units. *ACS Synth. Biol.* **5**: 774–780
- 675 Ceroni F, Algar R, Stan GB & Ellis T (2015) Quantifying cellular capacity identifies gene expression  
676 designs with reduced burden. *Nat. Methods* **12**: 415–418
- 677 Ceroni F, Furini S, Gorochofski TE, Boo A, Borkowski O, Ladak YN, Awan AR, Gilbert C, Stan G-B  
678 & Ellis T (2018) Burden-driven feedback control of gene expression. *Nat. Methods*: 177030
- 679 Charneski C a & Hurst LD (2013) Positively charged residues are the major determinants of  
680 ribosomal velocity. *PLoS Biol.* **11**: e1001508
- 681 Chen H, Shiroguchi K, Ge H & Xie XS (2015) Genome-wide study of mRNA degradation and  
682 transcript elongation in Escherichia coli. *Mol. Syst. Biol.* **11**: 781–781
- 683 Condrón BG, Atkins JF & Gesteland RF (1991a) Frameshifting in gene 10 of bacteriophage T7. *J.*  
684 *Bacteriol.* **173**: 6998–7003
- 685 Condrón BG, Gesteland RF & Atkins JF (1991b) An analysis of sequences stimulating frameshifting  
686 in the decoding of gene 10 of bacteriophage T7. *Nucleic Acids Res.* **19**: 5607–5612
- 687 Conesa A, Madrigal P, Tarazona S, Gomez-Cabrero D, Cervera A, McPherson A, Szczesniak MW,  
688 Gaffney DJ, Elo LL, Zhang X & Mortazavi A (2016) A survey of best practices for RNA-seq data  
689 analysis. *Genome Biol.* **17**: 1–19
- 690 Daniel R, Rubens JR, Sarpeshkar R & Lu TK (2013) Synthetic analog computation in living cells.  
691 *Nature* **497**: 619–623
- 692 Davidsohn N, Beal J, Kiani S, Adler A, Yaman F, Li Y, Xie Z & Weiss R (2015) Accurate Predictions  
693 of Genetic Circuit Behavior from Part Characterization and Modular Composition. *ACS Synth.*  
694 *Biol.* **4**: 673–681
- 695 Der BS, Glassey E, Bartley BA, Enghuus C, Goodman DB, Gordon DB, Voigt CA & Gorochofski TE  
696 (2017) DNAplotlib: Programmable Visualization of Genetic Designs and Associated Data. *ACS*  
697 *Synth. Biol.* **6**:
- 698 Dong H, Nilsson L & Kurland CG (1996) Co-variation of tRNA abundance and codon usage in  
699 Escherichia coli at different growth rates. *J. Mol. Biol.* **260**: 649–63
- 700 Endy D, You L, Yin J & Molineux IJ (2000) Computation, prediction, and experimental tests of fitness  
701 for bacteriophage T7 mutants with permuted genomes. *Proc. Natl. Acad. Sci.* **97**: 5375–5380

- 702 Espah Borujeni A, Channarasappa AS & Salis HM (2013) Translation rate is controlled by coupled  
703 trade-offs between site accessibility, selective RNA unfolding and sliding at upstream standby  
704 sites. *Nucleic Acids Res.*: gkt1139
- 705 Fernandez-Rodriguez J, Yang L, Gorochoowski TE, Gordon DB & Voigt CA (2015) Memory and  
706 Combinatorial Logic Based on DNA Inversions: Dynamics and Evolutionary Stability. *ACS*  
707 *Synth. Biol.* **4**:
- 708 Freistroffer D V., Kwiatkowski M, Buckingham RH & Ehrenberg M (2000) The accuracy of codon  
709 recognition by polypeptide release factors. *Proc. Natl. Acad. Sci.* **97**: 2046–2051
- 710 Giedroc DP & Cornish P V. (2009) Frameshifting RNA pseudoknots: Structure and mechanism.  
711 *Virus Res.* **139**: 193–208
- 712 Goodwin S, McPherson JD & McCombie WR (2016) Coming of age: Ten years of next-generation  
713 sequencing technologies. *Nat. Rev. Genet.* **17**: 333–351
- 714 Gorochoowski TE, Avciilar-Kucukgoze I, Bovenberg RAL, Roubos JA & Ignatova Z (2016) A Minimal  
715 Model of Ribosome Allocation Dynamics Captures Trade-offs in Expression between  
716 Endogenous and Synthetic Genes. *ACS Synth. Biol.* **5**:
- 717 Gorochoowski TE, Van Den Berg E, Kerkman R, Roubos JA & Bovenberg RAL (2014) Using  
718 synthetic biological parts and microbioreactors to explore the protein expression characteristics  
719 of escherichia coli. *ACS Synth. Biol.* **3**: 129–139
- 720 Gorochoowski TE, Espah Borujeni A, Park Y, Nielsen AAK, Zhang J, Der BS, Gordon DB & Voigt CA  
721 (2017) Genetic circuit characterization and debugging using RNA-seq. *Mol. Syst. Biol.* **13**:
- 722 Gorochoowski TE, Ignatova Z, Bovenberg RAL & Roubos JA (2015) Trade-offs between tRNA  
723 abundance and mRNA secondary structure support smoothing of translation elongation rate.  
724 *Nucleic Acids Res.* **43**: 3022–3032
- 725 Guisbert E, Herman C, Lu CZ & Gross CA (2004) A chaperone network controls the heat shock  
726 response in *E. coli*. *Genes Dev.* **18**: 2812–2821
- 727 Guo H, Ingolia NT, Weissman JS & Bartel DP (2010) Mammalian microRNAs predominantly act to  
728 decrease target mRNA levels. *Nature* **466**: 835–840
- 729 Guo MS & Gross CA (2014a) Stress-induced remodeling of the bacterial proteome. *Curr. Biol.* **24**:  
730 R424–R434
- 731 Guo MS & Gross CA (2014b) Stress-induced remodeling of the bacterial proteome. *Curr. Biol.* **24**:  
732 R424–R434
- 733 Gyorgy A, Jiménez JI, Yazbek J, Huang HH, Chung H, Weiss R & Del Vecchio D (2015) Isocost  
734 Lines Describe the Cellular Economy of Genetic Circuits. *Biophys. J.* **109**: 639–646
- 735 Hecht A, Glasgow J, Jaschke PR, Bawazer LA, Munson MS, Cochran JR, Endy D & Salit M (2017)



- 736 Measurements of translation initiation from all 64 codons in *E. coli*. *Nucleic Acids Res.* **45**:  
737 3615–3626
- 738 Ingolia NT (2014) Ribosome profiling: New views of translation, from single codons to genome  
739 scale. *Nat. Rev. Genet.* **15**: 205–213
- 740 Ingolia NT, Ghaemmaghami S, Newman JRS & Weissman JS (2009) Genome-wide analysis in vivo  
741 of translation with nucleotide resolution using ribosome profiling. *Science (80-. )*. **324**: 218–23
- 742 Iost I & Dreyfus M (1995) The stability of *Escherichia coli* lacZ mRNA depends upon the simultaneity  
743 of its synthesis and translation. *EMBO J.* **14**: 3252–61
- 744 Ivanov IP, Anderson CB, Gesteland RF & Atkins JF (2004) Identification of a new antizyme mRNA  
745 +1 frameshifting stimulatory pseudoknot in a subset of diverse invertebrates and its apparent  
746 absence in intermediate species. *J. Mol. Biol.* **339**: 495–504
- 747 Jackson RJ, Hellen CUT & Pestova T V. (2010) The mechanism of eukaryotic translation initiation  
748 and principles of its regulation. *Nat. Rev. Mol. Cell Biol.* **11**: 113–127
- 749 Jones DL, Brewster RC & Phillips R (2014) Promoter architecture dictates cell-to-cell variability in  
750 gene expression. *Science (80-. )*. **346**: 1533–1536
- 751 Justman Q (2018) Splitting the World with Absolute Measurements: A Call for Collaborations in  
752 Physical Biology. *Cell Syst.* **6**: 395–396
- 753 Kennell D & Riezman H (1977) Transcription and translation initiation frequencies of the *Escherichia*  
754 *coli* lac operon. *J. Mol. Biol.* **114**: 1–21
- 755 Lareau LF, Hite DH, Hogan GJ & Brown PO (2014) Distinct stages of the translation elongation  
756 cycle revealed by sequencing ribosome-protected mRNA fragments. *Elife* **2014**: 1–16
- 757 Li GW, Burkhardt D, Gross C & Weissman JS (2014) Quantifying absolute protein synthesis rates  
758 reveals principles underlying allocation of cellular resources. *Cell* **157**: 624–635
- 759 Lieberman-aiden E, Berkum NL Van, Williams L, Imakaev M, Ragoczy T, Telling A, Amit I, Lajoie  
760 BR, Sabo PJ, Dorschner MO, Sandstrom R, Bernstein B, Bender MA, Groudine M, Gnirke A,  
761 Stamatoyannopoulos J & Mirny LA (2009) Comprehensive Mapping of Long-Range Interactions  
762 Reveals Folding Principles of the Human Genome. *Science (80-. )*. **33292**: 289–294
- 763 Lucks JB, Mortimer SA, Trapnell C, Luo S, Aviran S, Schroth GP, Pachter L, Doudna JA & Arkin AP  
764 (2011) Multiplexed RNA structure characterization with selective 2'-hydroxyl acylation analyzed  
765 by primer extension sequencing (SHAPE-Seq). *Proc. Natl. Acad. Sci.* **108**: 11063–11068
- 766 Makarova O V, Makarov EM, Sousa R & Dreyfus M (1995) Transcribing of *Escherichia coli* genes  
767 with mutant T7 RNA polymerases: stability of lacZ mRNA inversely correlates with polymerase  
768 speed. *Proc. Natl. Acad. Sci. U. S. A.* **92**: 12250–4
- 769 Margolin W (2012) The price of tags in protein localization studies. *J. Bacteriol.* **194**: 6369–6371

- 770 Mayer A, Di Iulio J, Maleri S, Eser U, Vierstra J, Reynolds A, Sandstrom R, Stamatoyannopoulos JA  
771 & Churchman LS (2015) Native elongating transcript sequencing reveals human transcriptional  
772 activity at nucleotide resolution. *Cell* **161**: 541–544
- 773 Mogk A, Huber D & Bukau B (2011) Integrating protein homeostasis strategies in prokaryotes. *Cold*  
774 *Spring Harb. Perspect. Biol.* **3**: 1–19
- 775 Mohammad F, Woolstenhulme CJ, Green R & Buskirk AR (2016) Clarifying the Translational  
776 Pausing Landscape in Bacteria by Ribosome Profiling. *Cell Rep.* **14**: 686–694
- 777 Moon TS, Lou C, Tamsir A, Stanton BC & Voigt CA (2012) Genetic programs constructed from  
778 layered logic gates in single cells. *Nature* **491**: 249–253
- 779 Mortazavi A, Williams BA, McCue K, Schaeffer L & Wold B (2008) Mapping and quantifying  
780 mammalian transcriptomes by RNA-Seq. *Nat. Methods* **5**: 621–628
- 781 Mutalik VK, Guimaraes JC, Cambray G, Lam C, Christoffersen MJ, Mai QA, Tran AB, Paull M,  
782 Keasling JD, Arkin AP & Endy D (2013) Precise and reliable gene expression via standard  
783 transcription and translation initiation elements. *Nat. Methods* **10**: 354–360
- 784 Myers CJ, Beal J, Gorochoowski TE, Kuwahara H, Madsen C, McLaughlin JA, Misirli G, Nguyen T,  
785 Oberortner E, Samineni M, Wipat A, Zhang M & Zundel Z (2017) A standard-enabled workflow  
786 for synthetic biology. *Biochem. Soc. Trans.* **45**:
- 787 Nielsen AA & Voigt CA (2014) Multi-input CRISPR/Cas genetic circuits that interface host regulatory  
788 networks. *Mol. Syst. Biol.* **10**: 763–763
- 789 Nielsen AAK, Der BS, Shin J, Vaidyanathan P, Paralanov V, Strychalski EA, Ross D, Densmore D &  
790 Voigt CA (2016) Genetic circuit design automation. *Science (80-. ).* **352**:
- 791 Owens NDL, Blitz IL, Lane MA, Patrushev I, Overton JD, Gilchrist MJ, Cho KWY & Khokha MK  
792 (2016) Measuring Absolute RNA Copy Numbers at High Temporal Resolution Reveals  
793 Transcriptome Kinetics in Development. *Cell Rep.* **14**: 632–647
- 794 Poole ES, Brown CM & Tate WP (2000) The identity of the base following the stop codon  
795 determines the efficiency of in vivo translational termination in *Escherichia coli*. *EMBO J.* **14**:  
796 151–158
- 797 Raser JM & O’Shea EK (2005) Noise in Gene Expression: Origins, Consequences, and Control.  
798 *Science (80-. ).* **309**: 2010–2014
- 799 Salis HM, Mirsky E a & Voigt C a (2009) Automated design of synthetic ribosome binding sites to  
800 control protein expression. *Nat. Biotechnol.* **27**: 946–50
- 801 Seo SW, Yang JS, Kim I, Yang J, Min BE, Kim S & Jung GY (2013) Predictive design of mRNA  
802 translation initiation region to control prokaryotic translation efficiency. *Metab. Eng.* **15**: 67–74
- 803 Sharma V, Prère MF, Canal I, Firth AE, Atkins JF, Baranov P V. & Fayet O (2014) Analysis of tetra-

- 804 and hepta-nucleotides motifs promoting-1 ribosomal frameshifting in Escherichia coli. *Nucleic*  
805 *Acids Res.* **42**: 7210–7225
- 806 Shendure J, Balasubramanian S, Church GM, Gilbert W, Rogers J, Schloss JA & Waterston RH  
807 (2017) DNA sequencing at 40: Past, present and future. *Nature* **550**: 345–353
- 808 Siuti P, Yazbek J & Lu TK (2013) Synthetic circuits integrating logic and memory in living cells. *Nat.*  
809 *Biotechnol.* **31**: 448–452
- 810 Smanski MJ, Zhou H, Claesen J, Shen B, Fischbach MA & Voigt CA (2016) Synthetic biology to  
811 access and expand nature’s chemical diversity. *Nat. Rev. Microbiol.* **14**: 135–149
- 812 Snapp E (2005) Design and Use of Fluorescent Fusion Proteins in Cell Biology. *Curr. Protoc. Cell*  
813 *Biol.*
- 814 Tan SZ, Manchester S & Prather KLJ (2016) Controlling Central Carbon Metabolism for Improved  
815 Pathway Yields in *Saccharomyces cerevisiae*. *ACS Synth. Biol.* **5**: 116–124
- 816 Taniguchi Y, Choi PJ, Li G-W, Chen H, Babu M, Hearn J, Emili A & Xie XS (2010) Quantifying E.  
817 coli Proteome and Transcriptome with Single-Molecule Sensitivity in Single Cells. *Science* (80-  
818 ). **329**: 533 LP-538
- 819 Tholstrup J, Oddershede LB & Sørensen MA (2012) mRNA pseudoknot structures can act as  
820 ribosomal roadblocks. *Nucleic Acids Res.* **40**: 303–313
- 821 Tsuchihashi Z & Kornberg A (1990) Translational frameshifting generates the gamma subunit of  
822 DNA polymerase III holoenzyme. *Proc. Natl. Acad. Sci.* **87**: 2516–2520
- 823 Unoson C & Wagner EGH (2007) Dealing with stable structures at ribosome binding sites: Bacterial  
824 translation and ribosome standby. *RNA Biol.* **4**: 113–117
- 825 Wang L-Z, Wu F, Flores K, Lai Y-C & Wang X (2016) Build to understand: synthetic approaches to  
826 biology. *Integr. Biol.* **8**: 394–408
- 827 Wohlgemuth SE, Gorochofski TE & Roubos JA (2013) Translational sensitivity of the Escherichia  
828 coli genome to fluctuating tRNA availability. *Nucleic Acids Res.* **41**: 8021–8033
- 829 Yang L, Nielsen AAK, Fernandez-Rodriguez J, McClune CJ, Laub MT, Lu TK & Voigt CA (2014)  
830 Permanent genetic memory with >1-byte capacity. *Nat. Methods* **11**: 1261–1266
- 831 Yarchuk O, Jacques N, Guillerez J & Dreyfus M (1992) Interdependence of translation, transcription  
832 and mRNA degradation in the lacZ gene. *J. Mol. Biol.* **226**: 581–596

833

834 **Figures and Captions**

835

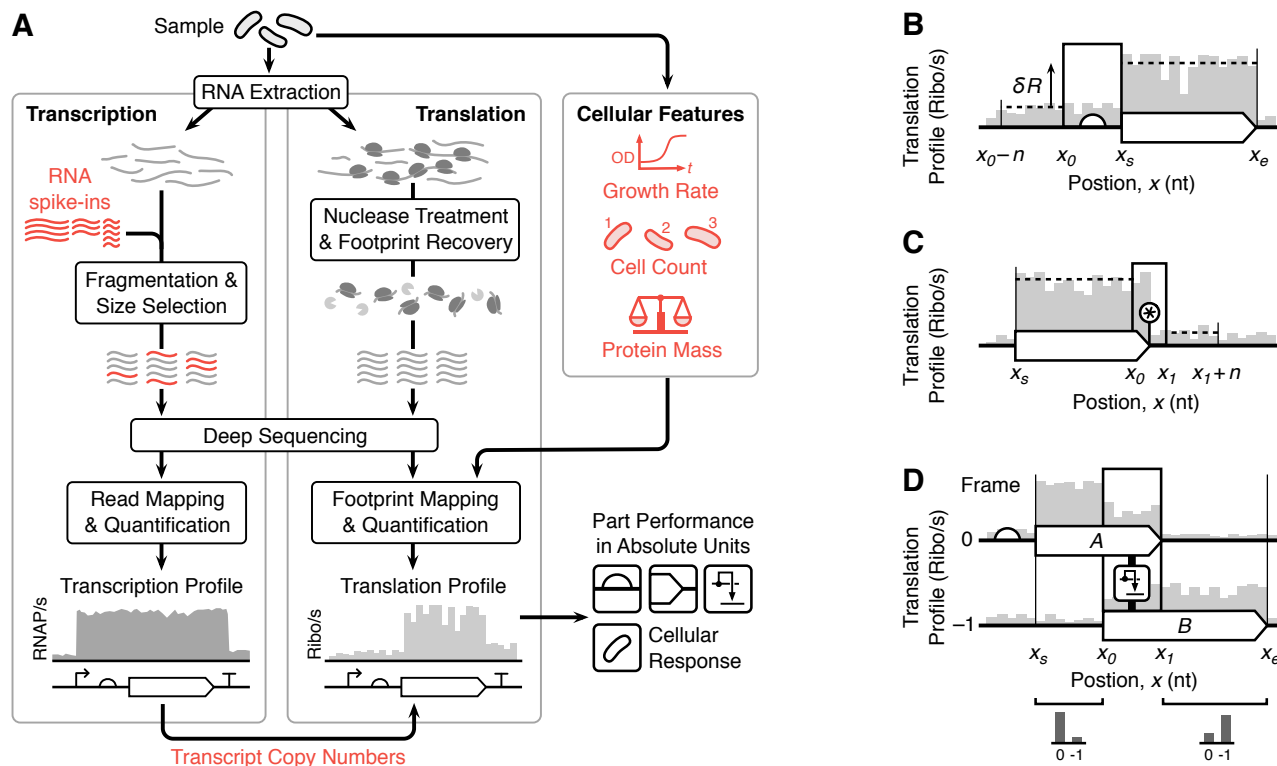

836

837

838 **Figure 1: Overview of the workflow.** (A) Major steps involved when quantifying transcription  
 839 (RNA-seq) and translation (Ribo-seq) and the additional cellular features measured. Elements  
 840 required for quantification in absolute units are highlighted in red. (B) Model for calculating the  
 841 translation initiation rate of a ribosome binding site (Eq. 2). (C) Model for calculating the termination  
 842 efficiency of a stop codon (Eq. 3). Star denotes the location of the stop codon. (D) Model for  
 843 calculating translational frameshifting efficiency between two coding regions 'A' and 'B' in zero and -  
 844 1 reading frames, respectively (Eq. 4).

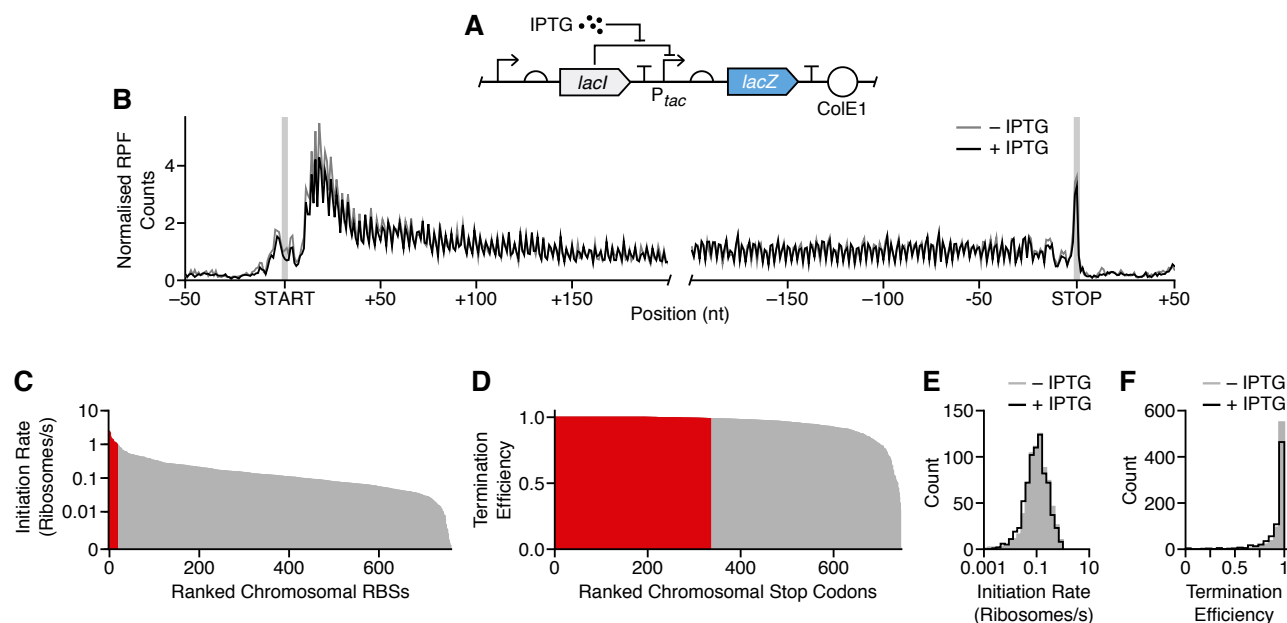

845

846

847

848

849

850

851

852

853

854

855

856

**Figure 2: Measuring translation initiation and termination signals across the *E. coli* transcriptome. (A) Genetic design of the LacZ reporter construct whose expression is activated by the inducer IPTG. (B) Normalized RPF count profile averaged for all *E. coli* transcripts. Profiles generated for cells grown in the absence and presence of IPTG (1 mM). Start and stop codons are shaded. (C) Bar chart of all measured RBS initiation rates ranked by their strength. Strong RBSs with initiation rates >1 ribosome/s are highlighted in red. (D) Bar chart of all measured stop codon termination efficiencies ranked by their strength. Stop codons with termination efficiency >0.99 are highlighted in red. (E) Distribution of initiation rates for cells grown in the absence and presence of IPTG (1 mM). (F) Distribution of stop codon termination efficiencies for cells grown in the absence and presence of IPTG (1 mM).**

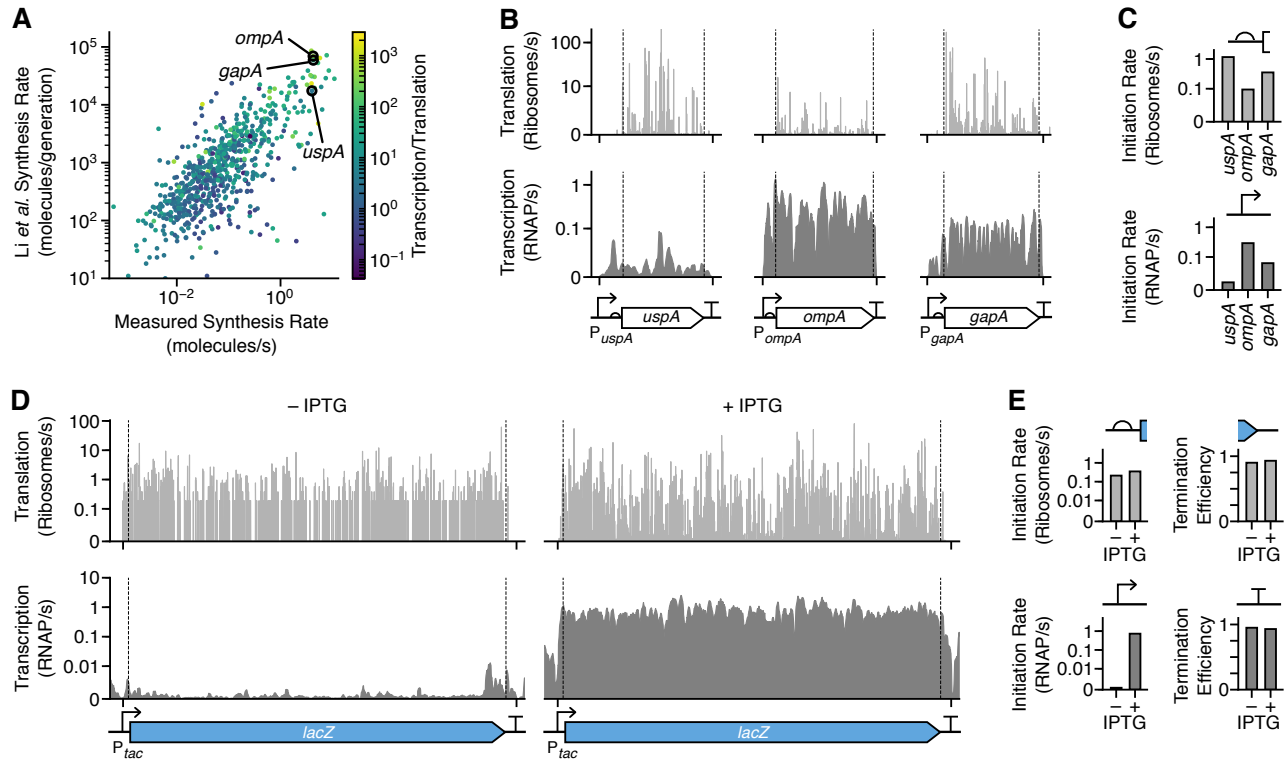

857

858

859

**Figure 3: Simultaneous quantification of transcription and translation of endogenous genes and a synthetic genetic construct.** (A) Comparison of protein synthesis rate of endogenous *E. coli* genes measured using Ribo-seq from this study (in molecules/s units) and from that by Li *et al.* (Li *et al.*, 2014) (in molecules/generation units). Each point corresponds to a single gene and color denotes the ratio of transcription and translation rate capturing whether transcription (light yellow) or translation (dark blue) is the dominant factor. (B) Transcription (bottom) and translation (top) profiles for *yggN*, *rpoH* and *greA*, computed from the RNA-seq and Ribo-seq data without induction. Positions of the genetic parts and gene are shown below the profiles. (C) Promoter strengths in RNAP/s units and RBS initiation rates in ribosome/s units. (D) Transcription (bottom) and translation (top) profiles for *lacZ*. Profiles are shown for cells in the absence and presence of IPTG (1 mM). Position of genetic parts and gene is shown below the profiles. RBS is omitted from the genetic design due to its size. (E) Measured promoter strength in RNAP/s units, RBS initiation rate in ribosomes/s units, and the transcriptional terminator and stop codon termination efficiency for *lacZ*. Data shown for cells in the absence and presence of IPTG (1 mM).

872

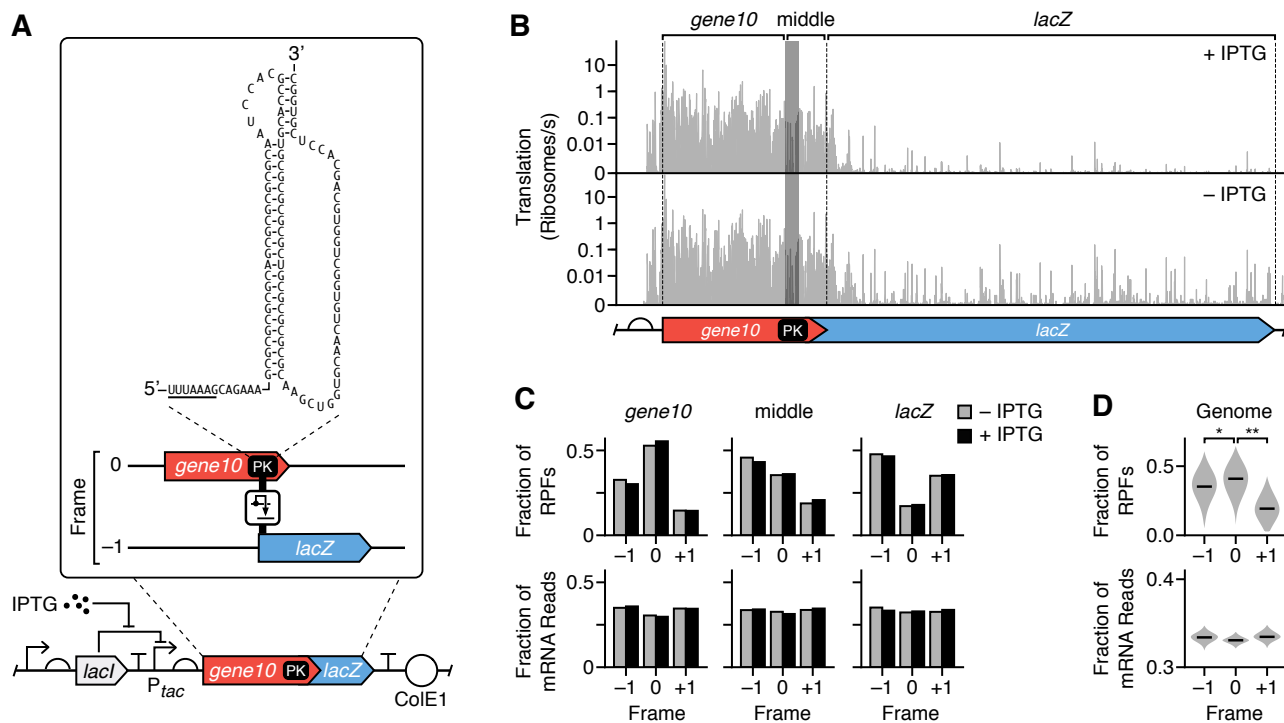

873

874

875

876

877

878

879

880

881

882

883

884

885

886

**Figure 4: Characterization of a synthetic pseudoknot construct that induces translational frameshifting.** (A) Genetic design of the PK-LacZ construct. Expanded sequence shows the PK secondary structure with the slippery site underlined, as well as the two genes (*gene10* and *lacZ*) in differing reading frames. (B) Translation profiles for the PK-LacZ construct in cells cultured in the absence (bottom) and presence (top) of IPTG (1 mM). The *gene10*, middle, and *lacZ* regions are labelled above the profiles. Shaded region denotes the PK, and dashed lines denote the start codon and stop codons of *gene10* and *LacZ*. (C) Fraction of the total RPFs and mRNA reads in each reading frame for the *gene10*, PK or middle, and *lacZ* regions schematically shown below and are of the PK-LacZ construct. Data shown separately for cells cultured in the absence and presence of IPTG (1 mM). (D) Violin plots of the distributions of fractions of total RPFs and mRNA reads in each reading frame for all *E. coli* transcripts. Median values shown by horizontal bars. \*,  $P = 0.049$ ; \*\*,  $P = 1.6 \times 10^{-9}$ .

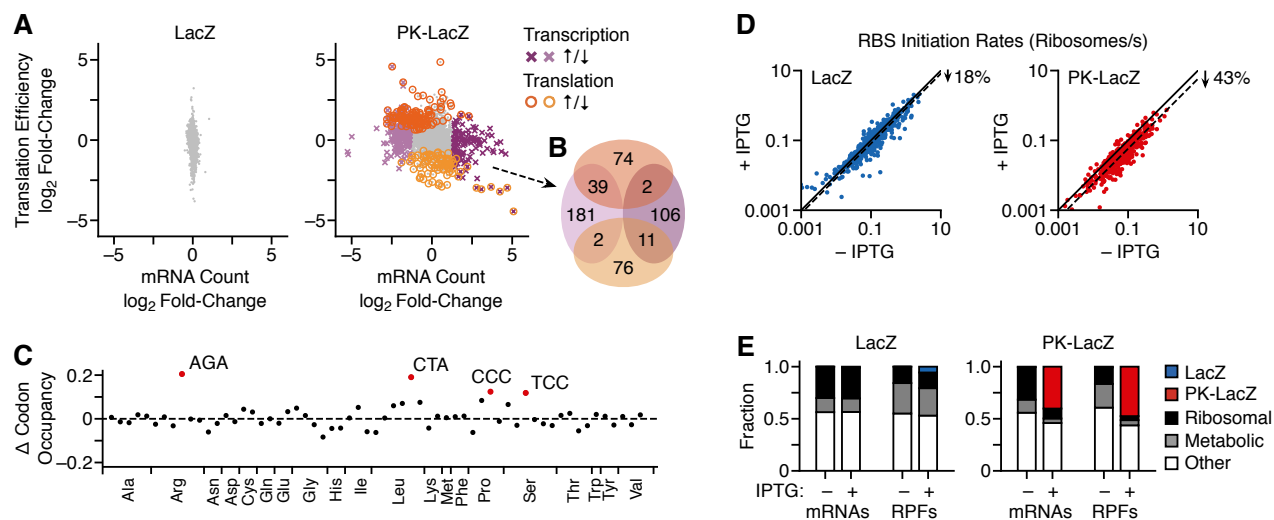

887  
888

889 **Figure 5: Cellular response to the expression of a synthetic pseudoknot construct. (A)**  
890 Change in expression of chromosomal genes in *E. coli* cells following induction of *PK-lacZ*  
891 expression (1 mM IPTG). Each point represents a transcript. Differentially expressed genes (mRNA  
892 count:  $P < 0.001$  and absolute  $\log_2$  fold-change  $> 1.37$ ; translation efficiency:  $P < 0.01$ ) are  
893 highlighted in color and by an alternative point shape (transcriptional regulation: purple cross;  
894 translational regulation: orange open circle). **(B)** Venn diagram of genes significantly regulated  
895 transcriptionally and translationally after induction of the PK-LacZ construct. Colors match those in  
896 panel A. **(C)** Change in codon occupancy for cells harboring the PK-LacZ construct after induction  
897 by IPTG (1 mM) calculated from the Ribo-seq data. Each point corresponds to a codon, which are  
898 ordered by amino acid identity and then by abundance in the genome (left most abundant, right least  
899 abundant). Dashed horizontal line denotes no change. Outliers are labelled and highlighted in red  
900 (Tukey test: 1.5 times the interquartile range below the first quartile or above the third quartile). **(D)**  
901 Translation initiation rates for all *E. coli* RBSs in cells harboring the LacZ and PK-LacZ constructs in  
902 the absence and presence of IPTG (1 mM). Solid line shows the same initiation rate for both  
903 conditions. Dotted lines denote linear regressions for the data with no offset. **(E)** Fractions of mRNA  
904 reads and RPFs mapping to each synthetic expression construct (LacZ and PK-LacZ) and *E. coli*  
905 transcripts, which are divided into three major categories: ribosomal, metabolic, and other functions.  
906 Data shown for cells cultured in the absence and presence of IPTG (1 mM).
